# Supplementary material for: N6-Methyladenosine-Related lncRNA Signature Predicts the Overall Survival of Colorectal Cancer Patients
Source: MDPI journal article supplement (doi:10.3390/genes12091375), 2021-08-31
Supplement: s1 [file s1]

## Supplementary Figures

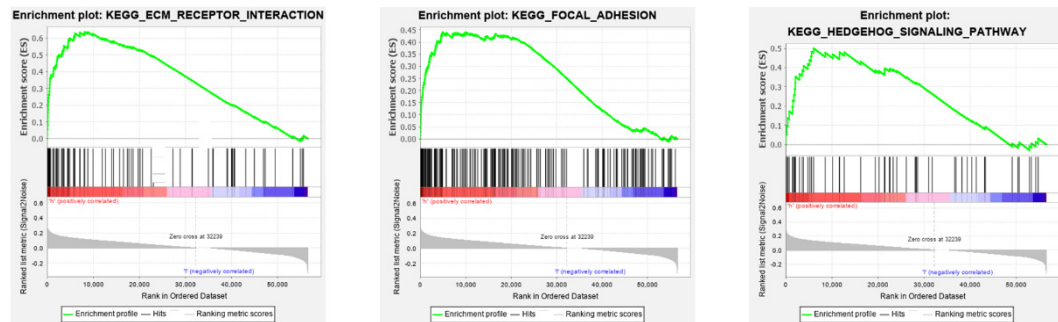

**Supplementary Figure S1** Gene set enrichment analysis (GSEA) for risk score based on m6A-related lncRNAs.

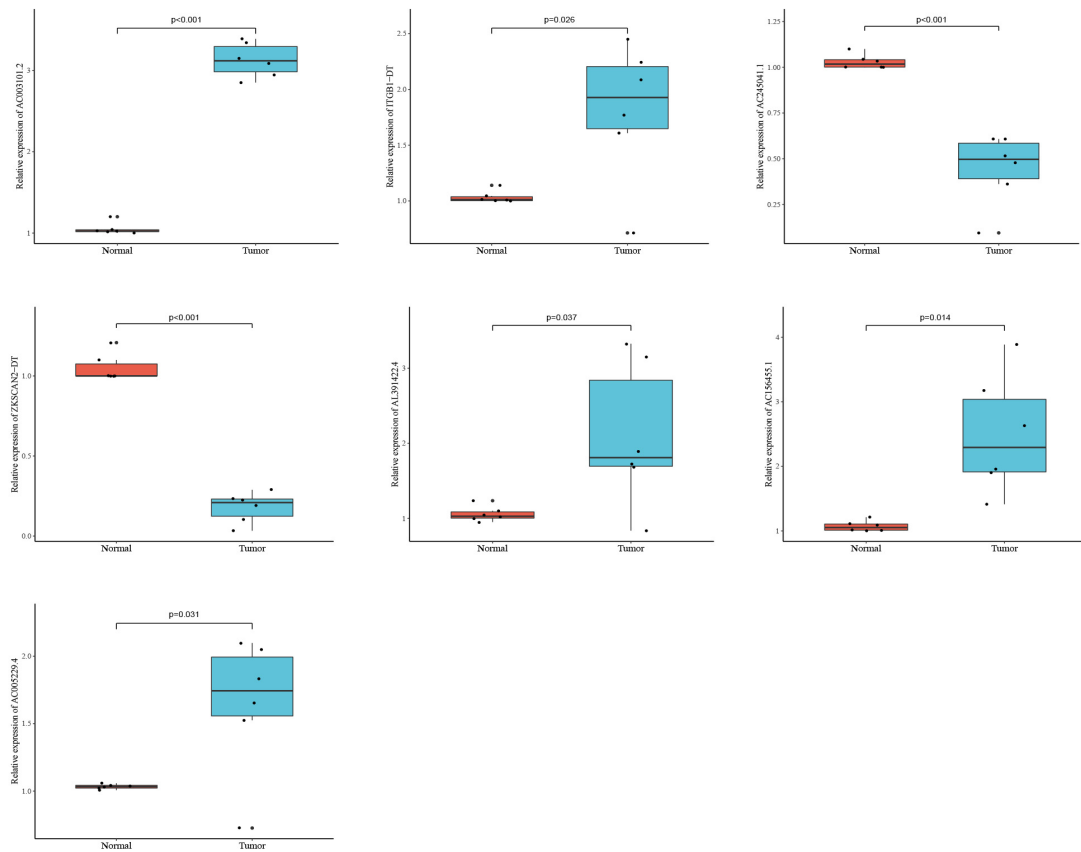

**Supplementary Figure S2** Expression levels of 7 m6A-related lncRNAs of prognostic signature in colorectal cancer tissues and corresponding normal tissues by RT-PCR.
