# Supplementary material for: N6-Methyladenosine-Related lncRNA Signature Predicts the Overall Survival of Colorectal Cancer Patients
Source: MDPI journal article supplement (doi:10.3390/genes12091375), 2021-08-31
Supplement: s1 [file s1]

**Supplementary Table S1** Summary of 23 recognized m6A regulators.

| <b>m6A regulators</b> | <b>Type</b> |
|-----------------------|-------------|
| METTL3                | writers     |
| METTL14               | writers     |
| METTL16               | writers     |
| WTAP                  | writers     |
| VIRMA                 | writers     |
| ZC3H13                | writers     |
| RBM15                 | writers     |
| RBM15B                | writers     |
| YTHDC1                | readers     |
| YTHDC2                | readers     |
| YTHDF1                | readers     |
| YTHDF2                | readers     |
| YTHDF3                | readers     |
| HNRNPC                | readers     |
| FMR1                  | readers     |
| LRPPRC                | readers     |
| HNRNPA2B1             | readers     |
| IGFBP1                | readers     |
| IGFBP2                | readers     |
| IGFBP3                | readers     |
| RBMX                  | readers     |
| FTO                   | erasers     |
| ALKBH5                | erasers     |

**Supplementary Table S2** | The primer sequences for qRT-PCR.

| Gene       | Primer Sequence                  |
|------------|----------------------------------|
| AC003101.2 | F: 5'-CTTGGGGGTGGGGAGAAC-3'      |
|            | R: 5'-GGGAGAGGAACAGGGGCT-3'      |
| ITGB1-DT   | F: 5'-GGAAACTTAGAAACCACC-3'      |
|            | R: 5'-GACAAAGAATCCAAAACA-3'      |
| AC245041.1 | F: 5'-AGTTTGAGAAGGCAGTGGCGTG-3'  |
|            | R: 5'-GGTGAGCTGAGGGTAAGGGGTG-3'  |
| ZKSCAN2-DT | F: 5'-GCCAAATACGAGTAACCACAGC-3'  |
|            | R: 5'-GCCAACCTAAACATAAAACCA-3'   |
| AL391422.4 | F: 5'-CACGACCAACTTTTATTC-3'      |
|            | R: 5'-TCTTGACACTCTCCATCT-3'      |
| AC156455.1 | F: 5'-CAGGAGCTAGAAATGTAG-3'      |
|            | R: 5'-GTAAGACCCAGTGAAAAC-3'      |
| AC005229.4 | F: 5'-AAACTAAAACACTACGCA-3'      |
|            | R: 5'-TAGAAGGATCACACAGAC-3'      |
| GAPDH      | F: 5'-GGAGTCCACTGGCGTCTTCA-3'    |
|            | R: 5'-GTCATGAGTCCTTCCACGATACC-3' |

**Supplementary Table S3** Univariate Cox regression analysis of lncRNAs associated with OS of CRC patients.

| <b>LncRNAs</b> | <b>HR</b> | <b>95% CI</b>  | <b>P value</b> |
|----------------|-----------|----------------|----------------|
| AC003101.2     | 2.837583  | (1.474-5.461)  | 0.001          |
| AP006621.2     | 1.21391   | (1.086-1.357)  | < 0.001        |
| AC010463.3     | 1.829169  | (1.188-2.816)  | 0.006          |
| AL391684.1     | 2.043285  | (1.234-3.385)  | 0.005          |
| PRKAR1B-AS2    | 1.959419  | (1.181-3.251)  | 0.009          |
| ITGB1-DT       | 2.323974  | (1.384-3.903)  | 0.001          |
| AC104794.3     | 1.332002  | (1.092-1.625)  | 0.004          |
| AC133540.1     | 1.370284  | (1.082-1.735)  | 0.008          |
| AC145285.2     | 3.957493  | (1.452-10.786) | 0.007          |
| AC016394.3     | 1.174474  | (1.047-1.318)  | 0.006          |
| MALINC1        | 3.108475  | (1.379-7.008)  | 0.006          |
| AP001619.1     | 1.618401  | (1.161-2.256)  | 0.004          |
| AL033384.2     | 1.674229  | (1.146-2.447)  | 0.007          |
| AL138756.1     | 1.228389  | (1.059-1.425)  | 0.006          |
| SEPTIN7-DT     | 4.759681  | (1.83-12.36)   | 0.001          |
| AC107375.1     | 1.303597  | (1.068-1.591)  | 0.009          |
| AC245041.1     | 1.409617  | (1.160-1.714)  | < 0.001        |
| ZKSCAN2-DT     | 1.41382   | (1.200-1.665)  | < 0.001        |
| AL391422.4     | 1.589563  | (1.169-2.161)  | 0.003          |
| AL161729.4     | 1.409218  | (1.163-1.707)  | < 0.001        |
| AC016737.1     | 1.530942  | (1.1164-2.099) | 0.008          |
| RPARP-AS1      | 1.238347  | (1.066-1.439)  | 0.005          |
| AL135999.1     | 1.817566  | (1.161-2.847)  | 0.009          |
| AC009404.1     | 1.948573  | (1.193-3.181)  | 0.007          |
| NSMCE1-DT      | 13.33001  | (3.132-56.735) | < 0.001        |
| AC009549.1     | 3.459762  | (1.394-8.590)  | 0.007          |
| AC013652.1     | 1.759801  | (1.200-2.580)  | 0.003          |
| AC156455.1     | 1.199453  | (1.097-1.312)  | < 0.001        |
| AC005229.4     | 1.494943  | (1.122-1.992)  | 0.006          |
